# Supplementary material for: “We go hunting…too”: Experiences of people living with obesity and food insecurity in an ethnically diverse community when shopping for supermarket foods
Source: Research Square preprint supplement (doi:10.21203/rs.3.rs-6697876/v1), 2025-07-10
Supplement: Supplementary file 2 [file fb8f76ca85dd1f653e2615cb.docx]

**Supplementary Material 2**

Coding framework from Hunter et al. (2025)

| Theme | Sub theme | Example Quote |
| --- | --- | --- |
| Conscious Consumer | Searching, planning and preparing | *‘on Lidl, on the website they have like, erm, lists of foods that are discounted for that particular week like erm, like chickens and like apples, oranges, you know, broccoli, stuff like that. So, usually I try and like, make the shopping list and the recipe around those particular things that are gonna be discounted this week.’ (Participant 15, male, age range 25-35)* |
| In-depth knowledge of food prices | *‘sometimes for my own sanity I will go into Waitrose and look at the cheap stuff and get it. But you know, their sardines are 15p*  *dearer than other places’, (Interview Participant 08, female, aged 45–54).* |
| Checking (and often ignoring) labels | *‘I try as much as possible to make um, the best possible choices … more often than not now I, I’m looking at the nutritional*  *information and just kind of closing my eyes a little bit to what’s on there. Which makes me feel pretty sad … ’ (Interview Participant 11, female, age range 35–44)* |
| Restricted Consumer | Healthy options off the table | *‘‘sometimes I’ve gone to buy chicken and I, I’ve only got a £1.50 budget and I can’t, the only chicken or turkey that I can get within that price range is a Bernard Matthew’s turkey, breaded turkey escalope … it’s nowhere near as healthy as just buying the plain chicken’ (Interview Participant 54, female, age range 45–54)* |
| Shop where you can, not where you want | *’I find like Lidl and Aldi quite visually, erm, it’s just quite a confusing experience … the checkouts tend to be a bit speedier and people seem to be a bit, maybe a bit more impatient in general … I sort of do a bit of an intake of breath before I go in to say the Lidls and Aldis … of course if you walk into somewhere like a Waitrose, everything’s displayed beautifully, the staff are so helpful and friendly … ’ (Interview Participant 11, female, age range 35–44)* |
| Shopping sustainability: Past and present practices | *‘my circumstances have changed like in the last couple of years so, I, I kind of, I can almost see a line between how I used to think before and how I used to think now and a lot of that, you know, things like sustainability, making sure that was eating, um, eh, foods that came from sustainable sources … I admit that I’ve picked up things in the last year that I wouldn’t have done before because I feel that, that financially that’s the option that I have and I have to make … ’ (Interview Participant 11, female, age range 35–44)* |
| The emotional toll of restriction | *'it's effin miserable knowing that I've only got lentils and the eggs available. You know, that, it’s repetitiveness is a crapper... I don't even recycle stuff sometimes, ‘cause I cannot be arsed. I've gotta save my leg energy just for existing and that, phew, that's just a…I'm sure I'm not the only person who lives like this’ (Participant 08, female, age range 45-54).* |
| Mitigating the Rising Cost of Food | Sacrificing quality, quantity and taste | *‘I force myself into eating some kind of healthier, cheaper options. So, like tinned sardines and things like that... I didn't actually like them, but I forced myself to eat them because it's a really cheap nutritious thing’ (Participant 45, female, age range 35-44)* |
| Maximising food shelf life | *‘So, money wise, it always has to be getting the most for the, like getting my money's worth basically. Erm and a lot of that time it seems to be the unhealthy option, you know like, eh, like frozen stuff for example, that lasts a lot longer than if you bought fresh, erm, fruit and veg, which, you know, if I don't eat it within a week, it's gone bad then you end up throwing it away.’ (Participant 29, male, age range 25-34)* |
| Minimising cooking energy costs | *‘when all of this [cost-of-living crisis] started I got rid of my big cooker. So now I've got like air fryer and erm, pressure cooker and you know, like, er, George Foreman Grill and that's so it's all little independent things...I can’t, couldn't afford to run it...It's just not worth it.’ (Participant 02, female, age range 45-54)* |
| Stigma: In store experiences | Weight stigma in store; can’t do right for doing wrong | *‘if you go to the pizza aisle, I feel like someone's looking at you because you are, you know, choosing a pizza. And if you go to the salad aisle, I feel like people are looking at you as if to say, who are you trying to kid?’ (Participant 21, female, age range 35-44)* |
| Poverty-related stigma: anticipated and experienced | *‘I couldn't afford the shop...I was short by something like, oh, 5p, or something so stupid and, anyway I had to put some back…I started crying and she [checkout operator] got really, really nasty then and like loads of the shoppers were staring’ (Participant 33, female, age range 25-34)* |
| Minimising stigma through action, agency and social comparisons | *‘I never go to a person manned [checkout] to check out…I also do the, the one where you get your handheld scanner at the beginning of your shop and then you scan your shopping as you go and then you check out that way. So all of your shopping is already bagged…unless you get, you know, one of those people who come and check to make sure that you haven't stolen anything, erm, 90% of the time nobody ever gets to see what I've purchased.’ (Interview Participant 21, female, age range 35–44)* |
